# Supplementary material for: High throughput cultivation-based screening on porous aluminum oxide chips allows targeted isolation of antibiotic resistant human gut bacteria
Source: PLoS One. 2019 Jan 17;14(1):e0210970. doi: 10.1371/journal.pone.0210970 (PMC6336267; doi:10.1371/journal.pone.0210970)
Supplement: S6 Table — Faecal samples of 20 patients were inoculated on PAO chips on top of agar media in duplo. Communities on GAM agar were harvested after 48 h and those on CP agar after 72 h. (XLSX) [file pone.0210970.s008.xlsx]

## Sheet: No. of reads
Supplementary Table S6 This table gives information about the number of reads that were obtained for each sample by 16S rRNA gene amplicon sequencing (MiSEQ). Faecal samples of 20 patients were inoculated on PAO chips on top of agar media in duplo. Communities on GAM agar were harvested after 48 h and those on CP agar after 72 h.
				GAM			GAM + SDD			CP			CP + SDD
Patient	Faecal samples		Sample ID	10-0	10-1	10-2	10-0	10-1	10-2	10-0	10-1	10-2	10-0	10-1	10-2
241	2		241 (1)	12075		34574	14019		51838	8920			2012		22929
	(54813, 14032)		241 (2)	222887		63202	114244		41963	15668			15377		2617
188	2		188 (1)	16486	3819	9616	3905	27528	980	159914		17067	4412		24330
	(95917, 237616)		188 (2)	19136	6996	2831	9355	14529	7742	60259		14121	9225		11636
202	2		202 (1)	1387	8723	15794	30244
	(1272, 56304)		202 (2)	13225	4195	1821	11016
145	1		145 (1)	47949		12446	32533	29082	77004	55035		6088	14799		2697
	(2678)		145 (2)	132419		56373	45249	25892	25948	6464		1079	2314		7897
256			256 (1)	25098		46535	205207
			256 (2)	10994		48081	12837
238	2		238 (1)	21396		62244	19894		90769	310326			86633		36188
	(87486, 43467)		238 (2)	68745		149739	104929		19713	96942			62351
239	2		239 (1)	2538		6648	18311		15827	86178		12585	5507		12258
	(42032, 52258)		239 (2)	15092		32535	16853		17431	4121		2747	3538		35720
142	2		142 (1)	30912		40247	28811	136283	8223	61010		206341	89583		9045
	(100391, 74306)		142 (2)	50838		78848	131025	131544	12246	121780		371078	4088		14184
201	2		201 (1)	87727		61353	49327		10454	44113			0		121045
	(16813, 21971)		201 (2)	39260		34525	41148		4162	210211			5673		10168
288	2		288 (1)	43265		42504	44114		8780	7381			5458
	(18841, 40696)		288 (2)	3356		48352	30409		3281	16008			40471
213			213 (1)	86702		2	6432		67109
			213 (2)	16757		21710	135068		17415
160	2		160 (1)	19197		63636	74931			84155
	67824, 87621)		160 (2)	75250		154135	93536			43297
210	2		210 (1)	22409	20505	4503	57428	991	66212	49021	8852	7281	37091	4311	211
	(36981, 6641)		210 (2)	12019	697	11316	35206	13100	6099	4139	9539	0	1291	8427	18301
131	2		131 (1)	5848	4289	4471	15	164	1849	3854	10348	11217	12467	10094	2729
	(25992, 102860)		131 (2)	36390	1	6623	14130	1222	440	474	25538	5263	86479	2449	72669
148	2		148 (1)	22169	47133	129203	682	2120	8040	37399	6279		28368	4253	45832
	(9397,33138)		148 (2)	36925	117595	9585	71259	29283	45741	2949	67716		143264	1191	1415
172	2		172 (1)	15894	10167	15425	68358		153978	46485		60002	6502		45755
	(68479, 2765)		172 (2)	171442		157845	49916		72298	37319		58173	1166		45113
209	2		209 (1)	60367		13846				29706
	(73128, 60618)		209 (2)	50252		17047				48309
198	2		198 (1)	49604	24055	8720	50169			49310
	(50210, 40964)		198 (2)	33006	50400	43972	45197			30126
236	2		236 (1)	83989		23360	170058		0	33954		32425	7147		6775
	(0, 31850)		236 (2)	22966		88299	24917		14299	21234		58080	8512		7889
266	2		266 (1)	62787		34698	11696	0	1284	98639		80814	11777
	(15506, 6309)		266 (2)	32979		10456	6008	2107	6814	155180		105253	10872
