# Supplementary material for: High throughput cultivation-based screening on porous aluminum oxide chips allows targeted isolation of antibiotic resistant human gut bacteria
Source: PLoS One. 2019 Jan 17;14(1):e0210970. doi: 10.1371/journal.pone.0210970 (PMC6336267; doi:10.1371/journal.pone.0210970)
Supplement: S7 Table — This table lists the taxonomic affiliations of OTUs that were found to be enriched at FDR-corrected p-values of >0.05. Bacterial communities were cultivated on GAM agar and CP agar, both in the presence and absence of the SDD cocktail of antibiotics. (XLSX) [file pone.0210970.s009.xlsx]

## Sheet: Blad1
Supplementary Table S7. Linear mixed-effect models of OTU-level composition data of bacterial growth were applied to investigate which OTUs varied in abundance as a results of cultivation conditions. This table lists the taxonomic affiliations of OTUs that were found to be enriched at FDR-corrected p-values of >0.05. Bacterial communities were cultivated on GAM agar and CP agar, both in the prese…
		Slope estimation				FDR-adjusted p-values				Bonferroni-adjusted p-values
Significantly higher abundanceon GAM media	OTU	Intercept	GAM	SDD	Interaction	Intercept	GAM	SDD	Interaction	Intercept	GAM	SDD	Interaction	Taxonomy
	3275	0.206284	1.31941	-0.141671	-0.0219193	0.861545	1.24898e-09	0.762448	0.984776	1	9.99181e-09	1	1	k__Bacteria;	p__Firmicutes;	c__Bacilli;	o__Bacillales;	f__Staphylococcaceae;	g__Staphylococcus
	2287	1.02688	1.60242	-0.0712579	-1.49273	0.0733806	8.21275e-06	0.960731	0.00785637	1	0.000156042	1	0.815946	k__Bacteria;	p__Bacteroidetes;	c__Bacteroidia;	o__Bacteroidales;	f__Bacteroidaceae;	g__Bacteroides
	2470	0.482391	1.33983	-0.196027	-0.452999	0.470771	5.28833e-05	0.785018	0.525053	1	0.00152405	1	1	k__Bacteria;	p__Bacteroidetes;	c__Bacteroidia;	o__Bacteroidales;	f__Bacteroidaceae;	g__Bacteroides
	3313	0.154359	0.714688	-0.10163	0.220088	0.870631	7.4935e-05	0.802006	0.591493	1	0.00239792	1	1	k__Bacteria;	p__Firmicutes;	c__Bacilli;	o__Bacillales;	f__Staphylococcaceae;	g__Staphylococcus
	786	-0.126245	0.585867	-0.0487578	0.200758	0.707891	9.27563e-05	0.918136	0.53856	1	0.00333923	1	1	k__Bacteria;	p__Firmicutes;	c__Bacilli;	o__Lactobacillales;	f__Enterococcaceae;	g__Enterococcus
	2590	-0.0139605	0.415057	0.0620269	-0.402295	0.983449	0.000151797	0.798734	0.0207499	1	0.00576831	1	1	k__Bacteria;	p__Bacteroidetes;	c__Bacteroidia;	o__Bacteroidales;	f__Bacteroidaceae;	g__Bacteroides
	2279	0.0345453	0.444085	0.0618715	-0.331075	0.925661	0.000597297	0.841959	0.133241	1	0.028073	1	1	k__Bacteria;	p__Bacteroidetes;	c__Bacteroidia;	o__Bacteroidales;	f__Bacteroidaceae;	g__Bacteroides
	2702	0.0476214	0.671683	0.0206179	-0.422053	0.918253	0.000640739	0.983449	0.243969	1	0.0320369	1	1	k__Bacteria;	p__Bacteroidetes;	c__Bacteroidia;	o__Bacteroidales;	f__Bacteroidaceae;	g__Bacteroides
	2089	0.044265	0.439858	0.115254	-0.487475	0.921153	0.00108288	0.621954	0.0193899	1	0.062807	1	1	k__Bacteria;	p__Bacteroidetes;	c__Bacteroidia;	o__Bacteroidales;	f__Porphyromonadaceae;	g__Parabacteroides
	3665	0.117166	0.433458	-0.0436459	-0.373387	0.758679	0.00129399	0.911817	0.0926965	1	0.0789331	1	1	k__Bacteria;	p__Firmicutes;	c__Clostridia;	o__Clostridiales;	f__Lachnospiraceae;	g__Incertae_Sedis
	2257	0.00552306	0.700516	0.0172505	-0.597694	0.996726	0.00139297	0.984208	0.102872	1	0.091936	1	1	k__Bacteria;	p__Bacteroidetes;	c__Bacteroidia;	o__Bacteroidales;	f__Bacteroidaceae;	g__Bacteroides
	648	-0.1072	0.431947	-0.0362485	0.219531	0.719353	0.00139297	0.928312	0.399306	1	0.0903892	1	1	k__Bacteria;	p__Firmicutes;	c__Bacilli;	o__Lactobacillales;	f__Enterococcaceae;	g__Enterococcus
	3088	0.641035	0.703508	-0.0534026	-0.991587	0.224188	0.00175599	0.94396	0.00266529	1	0.12292	1	0.207893	k__Bacteria;	p__Firmicutes;	c__Clostridia;	o__Clostridiales;	f__Lachnospiraceae;	g__g
	1087	-0.0979397	0.391771	-0.0408853	0.233572	0.720406	0.00185063	0.911817	0.315478	1	0.136946	1	1	k__Bacteria;	p__Firmicutes;	c__Bacilli;	o__Lactobacillales;	f__Enterococcaceae;	g__Enterococcus
	2624	0.00910499	0.315777	0.0808587	-0.37258	0.985336	0.00538964	0.690527	0.032791	1	0.490457	1	1	k__Bacteria;	p__Bacteroidetes;	c__Bacteroidia;	o__Bacteroidales;	f__Bacteroidaceae;	g__Bacteroides
	2164	0.037982	0.429991	0.0470727	-0.438315	0.925563	0.00769203	0.918445	0.090966	1	0.784587	1	1	k__Bacteria;	p__Bacteroidetes;	c__Bacteroidia;	o__Bacteroidales;	f__Porphyromonadaceae;	g__Odoribacter
	2416	-0.0498153	0.497676	0.0776664	-0.217934	0.920499	0.00950254	0.875603	0.599738	1	1	1	1	k__Bacteria;	p__Bacteroidetes;	c__Bacteroidia;	o__Bacteroidales;	f__Bacteroidaceae;	g__Bacteroides
	1446	-0.0411518	0.325335	-0.062759	0.164597	0.911817	0.0114183	0.824754	0.524424	1	1	1	1	k__Bacteria;	p__Firmicutes;	c__Bacilli;	o__Bacillales;	f__Staphylococcaceae;	g__Staphylococcus
	2343	0.0769592	0.40146	0.0644645	-0.333552	0.830947	0.0160408	0.878924	0.248452	1	1	1	1	k__Bacteria;	p__Bacteroidetes;	c__Bacteroidia;	o__Bacteroidales;	f__Bacteroidaceae;	g__Bacteroides
	140	-0.0706803	0.398144	0.0587211	-0.275995	0.879659	0.0220756	0.901898	0.376088	1	1	1	1	k__Bacteria;	p__Proteobacteria;	c__Gammaproteobacteria;	o__Enterobacteriales;	f__Enterobacteriaceae;	g__Proteus
	2101	0.311627	0.385053	-0.0382319	-0.535566	0.464755	0.0220756	0.94396	0.0314508	1	1	1	1	k__Bacteria;	p__Bacteroidetes;	c__Bacteroidia;	o__Bacteroidales;	f__Porphyromonadaceae;	g__Parabacteroides
	2507	0.362874	0.537204	-0.0682313	-0.405751	0.334693	0.0438667	0.924485	0.387604	1	1	1	1	k__Bacteria;	p__Bacteroidetes;	c__Bacteroidia;	o__Bacteroidales;	f__Bacteroidaceae;	g__Bacteroides
Significantly higher abundance on CP media	117	1.28756	-1.28717	0.180534	-0.165062	0	0	0.438874	0.629537	0	0	1	1	k__Bacteria;	p__Proteobacteria;	c__Gammaproteobacteria;	o__Oceanospirillales;	f__Halomonadaceae;	g__Halomonas
	113	1.57346	-1.57452	0.454529	-0.4144	0	0	0.0136766	0.110607	0	0	1	1	k__Bacteria;	p__Proteobacteria;	c__Gammaproteobacteria;	o__Oceanospirillales;	f__Halomonadaceae;	g__Halomonas
	322	1.71454	-1.60179	-1.50448	1.34179	3.30669e-12	0	3.30669e-12	3.24335e-06	2.12443e-11	0	2.31468e-11	5.83804e-05	k__Bacteria;	p__Firmicutes;	c__Clostridia;	o__Clostridiales;	f__Ruminococcaceae;	g__g
	3631	0.880634	-0.872435	-0.819891	0.814956	2.75574e-08	2.05409e-07	3.32452e-05	0.00188399	2.50241e-07	2.67032e-06	0.00083113	0.141299	k__Bacteria;	p__Firmicutes;	c__Clostridia;	o__Clostridiales;	f__Lachnospiraceae;	g__Incertae_Sedis
	3635	0.840453	-0.832641	-0.80942	0.804093	2.75574e-08	2.32672e-07	1.86865e-05	0.00139297	2.75574e-07	3.25741e-06	0.000411103	0.0914115	k__Bacteria;	p__Firmicutes;	c__Clostridia;	o__Clostridiales;	f__Lachnospiraceae;	g__Incertae_Sedis
	3628	0.816761	-0.808883	-0.782607	0.778353	6.36843e-08	4.14713e-07	3.12946e-05	0.00179749	7.00527e-07	6.2207e-06	0.00075107	0.131217	k__Bacteria;	p__Firmicutes;	c__Clostridia;	o__Clostridiales;	f__Lachnospiraceae;	g__Incertae_Sedis
	3573	0.820334	-0.812641	-0.756533	0.75045	6.41144e-08	7.07355e-07	8.52756e-05	0.0038248	7.69373e-07	1.13177e-05	0.00289937	0.320612	k__Bacteria;	p__Firmicutes;	c__Clostridia;	o__Clostridiales;	f__Lachnospiraceae;	g__Incertae_Sedis
	560	0.74522	-0.750419	-0.021569	0.0739221	1.86865e-05	2.49277e-06	0.983094	0.90853	0.000392891	4.23771e-05	1	1	k__Bacteria;	p__Firmicutes;	c__Bacilli;	o__Lactobacillales;	f__Streptococcaceae;	g__Streptococcus
	1125	1.11671	-0.68908	0.0288878	0.336897	0.000689002	2.32929e-05	0.969994	0.271421	0.0365171	0.000535736	1	1	k__Bacteria;	p__Firmicutes;	c__Bacilli;	o__Lactobacillales;	f__Enterococcaceae;	g__Enterococcus
	2108	0.377465	-0.371368	-0.352587	0.346376	0.000207036	9.02584e-05	0.0015098	0.0225562	0.00828144	0.00315904	0.102667	1	k__Bacteria;	p__Bacteroidetes;	c__Bacteroidia;	o__Bacteroidales;	f__Porphyromonadaceae;	g__Parabacteroides
	3569	0.257829	-0.261214	-0.248929	0.253271	7.4511e-05	0.000319554	0.00351486	0.0293717	0.00230984	0.0132729	0.288219	1	k__Bacteria;	p__Firmicutes;	c__Clostridia;	o__Clostridiales;	f__Lachnospiraceae;	g__Incertae_Sedis
	1132	0.997856	-0.617943	0.017206	0.368312	0.000601403	0.000319554	0.983449	0.243297	0.0289984	0.0134213	1	1	k__Bacteria;	p__Firmicutes;	c__Bacilli;	o__Lactobacillales;	f__Enterococcaceae;	g__Enterococcus
	3625	0.310858	-0.311345	-0.295266	0.299002	0.000151797	0.000405597	0.00450736	0.0339584	0.00567818	0.0182519	0.383126	1	k__Bacteria;	p__Firmicutes;	c__Clostridia;	o__Clostridiales;	f__Lachnospiraceae;	g__Incertae_Sedis
	1130	0.936578	-0.568042	-0.136419	0.39167	0.00102027	0.000480209	0.63015	0.169901	0.0581557	0.0220896	1	1	k__Bacteria;	p__Firmicutes;	c__Bacilli;	o__Lactobacillales;	f__Enterococcaceae;	g__Enterococcus
	190	0.387305	-0.387168	0.190015	-0.174225	3.40998e-05	0.000646936	0.243297	0.444618	0.000920694	0.0329937	1	1	k__Bacteria;	p__Proteobacteria;	c__Betaproteobacteria;	o__Burkholderiales;	f__Oxalobacteraceae;	g__Undibacterium
	2111	0.272535	-0.272018	-0.28545	0.270594	0.00033961	0.000675702	0.00189439	0.0339584	0.0149428	0.0351365	0.143974	1	k__Bacteria;	p__Bacteroidetes;	c__Bacteroidia;	o__Bacteroidales;	f__Porphyromonadaceae;	g__Parabacteroides
	2276	-0.00811165	0.317125	0.0565551	-0.265119	0.987365	0.00102027	0.780496	0.096535	1	0.0576774	1	1	k__Bacteria;	p__Bacteroidetes;	c__Bacteroidia;	o__Bacteroidales;	f__Bacteroidaceae;	g__Bacteroides
	173	0.492144	-0.490848	0.394403	-0.408013	0.000166073	0.0011697	0.0339584	0.109073	0.00647684	0.0690124	1	1	k__Bacteria;	p__Proteobacteria;	c__Gammaproteobacteria;	o__Alteromonadales;	f__Idiomarinaceae;	g__g
	1137	0.984701	-0.585932	0.105121	0.200579	0.00121304	0.00139297	0.78634	0.623478	0.0727827	0.0916629	1	1	k__Bacteria;	p__Firmicutes;	c__Bacilli;	o__Lactobacillales;	f__Enterococcaceae;	g__Enterococcus
	44	0.770491	-0.557379	-0.793072	0.534854	0.000323241	0.00172276	5.28833e-05	0.0634425	0.0138993	0.11887	0.00153362	1	k__Bacteria;	p__Proteobacteria;	c__Gammaproteobacteria;	o__Enterobacteriales;	f__Enterobacteriaceae;	g__Escherichia-Shigella
	1176	-0.0596057	0.271788	-0.0237561	0.023799	0.758679	0.00179034	0.925563	0.956275	1	0.128904	1	1	k__Bacteria;	p__Firmicutes;	c__Bacilli;	o__Lactobacillales;	f__Enterococcaceae;	g__Enterococcus
	1248	-0.0713512	0.307584	-0.0331823	0.142919	0.750988	0.00240677	0.911817	0.481629	1	0.185321	1	1	k__Bacteria;	p__Firmicutes;	c__Bacilli;	o__Lactobacillales;	f__Enterococcaceae;	g__Enterococcus
	3763	-0.00316773	0.535501	-0.0367474	-0.573318	0.996949	0.00527963	0.960251	0.0602441	1	0.475167	1	1	k__Bacteria;	p__Firmicutes;	c__Clostridia;	o__Clostridiales;	f__Clostridiaceae;	g__Clostridium
	2282	0.0169401	0.205343	0.0536931	-0.222813	0.94872	0.00539467	0.687121	0.0575768	1	0.501704	1	1	k__Bacteria;	p__Bacteroidetes;	c__Bacteroidia;	o__Bacteroidales;	f__Bacteroidaceae;	g__Bacteroides
	3772	-0.00285862	0.388878	-0.0422814	-0.398534	0.996949	0.00539467	0.918253	0.0730192	1	0.499967	1	1	k__Bacteria;	p__Firmicutes;	c__Clostridia;	o__Clostridiales;	f__Clostridiaceae;	g__Clostridium
	2485	0.0194892	0.260739	0.0100195	-0.146135	0.960007	0.00577991	0.983449	0.414924	1	0.549091	1	1	k__Bacteria;	p__Bacteroidetes;	c__Bacteroidia;	o__Bacteroidales;	f__Bacteroidaceae;	g__Bacteroides
	957	-0.0416393	0.197714	-0.0168446	-0.0334444	0.83511	0.00584705	0.94396	0.894982	1	0.561316	1	1	k__Bacteria;	p__Firmicutes;	c__Bacilli;	o__Lactobacillales;	f__Enterococcaceae;	g__Enterococcus
	3737	0.0981002	0.248729	-0.03403	-0.301313	0.687045	0.00716939	0.891828	0.0328755	1	0.709769	1	1	k__Bacteria;	p__Firmicutes;	c__Clostridia;	o__Clostridiales;	f__Lachnospiraceae;	g__Incertae_Sedis
	1455	0.00928647	0.238758	-0.00712112	-0.218998	0.983449	0.00767534	0.984208	0.138165	1	0.775209	1	1	k__Bacteria;	p__Firmicutes;	c__Clostridia;	o__Clostridiales;	f__Lachnospiraceae;	g__g
	695	-0.0752359	0.300779	-0.0217892	0.12493	0.762362	0.00785637	0.960007	0.612051	1	0.824173	1	1	k__Bacteria;	p__Firmicutes;	c__Bacilli;	o__Lactobacillales;	f__Enterococcaceae;	g__Enterococcus
	2297	0.00765643	0.221436	0.0418302	-0.193743	0.983449	0.00785637	0.819482	0.17092	1	0.824918	1	1	k__Bacteria;	p__Bacteroidetes;	c__Bacteroidia;	o__Bacteroidales;	f__Bacteroidaceae;	g__Bacteroides
	116	0.33291	-0.332345	0.184055	-0.190156	0.0013062	0.00891305	0.301481	0.43337	0.0809842	0.944784	1	1	k__Bacteria;	p__Proteobacteria;	c__Gammaproteobacteria;	o__Alteromonadales;	f__Idiomarinaceae;	g__Idiomarina
	56	1.20504	-0.636233	-1.13914	0.53499	0.000714245	0.00910105	1.01896e-05	0.204633	0.0392835	0.973812	0.000203793	1	k__Bacteria;	p__Proteobacteria;	c__Gammaproteobacteria;	o__Enterobacteriales;	f__Enterobacteriaceae;	g__Escherichia-Shigella
	58	0.325311	-0.224002	-0.322847	0.215903	0.0128266	0.00950254	0.000601403	0.122672	1	1	0.0294688	1	k__Bacteria;	p__Proteobacteria;	c__Gammaproteobacteria;	o__Enterobacteriales;	f__Enterobacteriaceae;	g__Escherichia-Shigella
	491	0.0244235	0.222964	-0.00448812	-0.211725	0.923782	0.00968673	0.987799	0.133241	1	1	1	1	k__Bacteria;	p__Firmicutes;	c__Clostridia;	o__Clostridiales;	f__Lachnospiraceae;	g__g
	2622	0.0234439	0.194401	0.0857482	-0.187095	0.976054	0.0114183	0.447405	0.133241	1	1	1	1	k__Bacteria;	p__Bacteroidetes;	c__Bacteroidia;	o__Bacteroidales;	f__Bacteroidaceae;	g__Bacteroides
	2198	0.267583	-0.242053	-0.261659	0.279555	0.00177499	0.0114183	0.0184144	0.0629712	0.126024	1	1	1	k__Bacteria;	p__Bacteroidetes;	c__Bacteroidia;	o__Bacteroidales;	f__Rikenellaceae;	g__Alistipes
	3709	0.039515	0.192492	-0.0159265	-0.213985	0.849328	0.0128266	0.955141	0.0742746	1	1	1	1	k__Bacteria;	p__Firmicutes;	c__Clostridia;	o__Clostridiales;	f__Lachnospiraceae;	g__Incertae_Sedis
	2545	0.0475172	0.144332	0.0358367	-0.177387	0.789188	0.0135073	0.742175	0.046162	1	1	1	1	k__Bacteria;	p__Bacteroidetes;	c__Bacteroidia;	o__Bacteroidales;	f__Bacteroidaceae;	g__Bacteroides
	83	0.976264	-0.511938	-0.869693	0.336275	0.00470482	0.0135413	7.4511e-05	0.372071	0.40932	1	0.00225538	1	k__Bacteria;	p__Proteobacteria;	c__Gammaproteobacteria;	o__Enterobacteriales;	f__Enterobacteriaceae;	g__Escherichia-Shigella
	2374	-0.0252019	0.196489	-0.0124988	-0.171271	0.90853	0.0136768	0.972519	0.213376	1	1	1	1	k__Bacteria;	p__Bacteroidetes;	c__Bacteroidia;	o__Bacteroidales;	f__Bacteroidaceae;	g__Bacteroides
	2378	-0.0172435	0.215032	0.0160712	-0.223156	0.952259	0.0147996	0.960731	0.115112	1	1	1	1	k__Bacteria;	p__Bacteroidetes;	c__Bacteroidia;	o__Bacteroidales;	f__Bacteroidaceae;	g__Bacteroides
	71	0.942509	-0.563633	-1.01011	0.574701	0.00147617	0.0151971	3.40998e-05	0.12205	0.0989035	1	0.000915176	1	k__Bacteria;	p__Proteobacteria;	c__Gammaproteobacteria;	o__Enterobacteriales;	f__Enterobacteriaceae;	g__Escherichia-Shigella
	3651	0.00155504	0.171891	-0.0220353	-0.17216	0.996949	0.0158993	0.911817	0.135195	1	1	1	1	k__Bacteria;	p__Firmicutes;	c__Clostridia;	o__Clostridiales;	f__Lachnospiraceae;	g__Incertae_Sedis
	222	-0.0493565	0.205953	-0.0188616	0.0217605	0.847624	0.01875	0.948696	0.960007	1	1	1	1	k__Bacteria;	p__Firmicutes;	c__Bacilli;	o__Lactobacillales;	f__Enterococcaceae;	g__Enterococcus
	588	0.1671	-0.162883	-0.0694938	0.0480425	0.0159318	0.0199119	0.516151	0.792094	1	1	1	1	k__Bacteria;	p__Firmicutes;	c__Bacilli;	o__Lactobacillales;	f__Lactobacillaceae;	g__Lactobacillus
	1070	-0.0194041	0.162282	-0.0127722	-0.114219	0.918253	0.0211417	0.960731	0.36631	1	1	1	1	k__NA;	p__p;	c__c;	o__o;	f__f;	g__g
	2377	-0.0270006	0.219206	-0.0167975	-0.149054	0.91483	0.0220756	0.963396	0.391321	1	1	1	1	k__Bacteria;	p__Bacteroidetes;	c__Bacteroidia;	o__Bacteroidales;	f__Bacteroidaceae;	g__Bacteroides
	2370	-0.0428969	0.283019	-0.00844643	-0.0139986	0.872778	0.0220756	0.984776	0.983449	1	1	1	1	k__Bacteria;	p__Bacteroidetes;	c__Bacteroidia;	o__Bacteroidales;	f__Bacteroidaceae;	g__Bacteroides
	3580	0.206934	-0.165051	-0.180132	0.144964	0.00526329	0.0225562	0.0314508	0.243832	0.467164	1	1	1	k__Bacteria;	p__Firmicutes;	c__Clostridia;	o__Clostridiales;	f__Lachnospiraceae;	g__Incertae_Sedis
	1302	0.2487	-0.176752	0.0517896	0.12795	0.272795	0.0237579	0.706921	0.356485	1	1	1	1	k__Bacteria;	p__Firmicutes;	c__Bacilli;	o__Lactobacillales;	f__Enterococcaceae;	g__Enterococcus
	2373	-0.0219775	0.174108	0.0298618	-0.192585	0.911817	0.0258865	0.878924	0.117127	1	1	1	1	k__Bacteria;	p__Bacteroidetes;	c__Bacteroidia;	o__Bacteroidales;	f__Bacteroidaceae;	g__Bacteroides
	3708	-0.00702859	0.181017	0.0134331	-0.141416	0.983449	0.0260599	0.969331	0.31685	1	1	1	1	k__Bacteria;	p__Firmicutes;	c__Clostridia;	o__Clostridiales;	f__Lachnospiraceae;	g__Incertae_Sedis
	2542	0.126561	0.202609	-0.00173257	-0.215191	0.629656	0.0275425	0.996949	0.138165	1	1	1	1	k__Bacteria;	p__Bacteroidetes;	c__Bacteroidia;	o__Bacteroidales;	f__Bacteroidaceae;	g__Bacteroides
	1179	0.368818	-0.250731	0.045314	0.150767	0.117127	0.0278726	0.874134	0.481629	1	1	1	1	k__Bacteria;	p__Firmicutes;	c__Bacilli;	o__Lactobacillales;	f__Enterococcaceae;	g__Enterococcus
	2379	-0.0249828	0.207	0.0256091	-0.196792	0.918253	0.0280797	0.921153	0.215853	1	1	1	1	k__Bacteria;	p__Bacteroidetes;	c__Bacteroidia;	o__Bacteroidales;	f__Bacteroidaceae;	g__Bacteroides
	2989	-0.00433989	0.272965	0.0073605	-0.226881	0.990705	0.0283664	0.985021	0.291278	1	1	1	1	k__Bacteria;	p__Firmicutes;	c__Clostridia;	o__Clostridiales;	f__Lachnospiraceae;	g__Incertae_Sedis
	2375	-0.00727397	0.242508	-0.0196992	-0.107798	0.984208	0.028907	0.960731	0.644326	1	1	1	1	k__Bacteria;	p__Bacteroidetes;	c__Bacteroidia;	o__Bacteroidales;	f__Bacteroidaceae;	g__Bacteroides
	220	-0.0351544	0.158686	-0.0138205	-0.00354802	0.870631	0.0328755	0.960007	0.993483	1	1	1	1	k__Bacteria;	p__Firmicutes;	c__Bacilli;	o__Lactobacillales;	f__Enterococcaceae;	g__Enterococcus
	3238	0.0445367	0.164291	-0.00986146	-0.178829	0.826682	0.0375936	0.981495	0.15584	1	1	1	1	k__Bacteria;	p__Firmicutes;	c__Bacilli;	o__Lactobacillales;	f__Enterococcaceae;	g__Enterococcus
	3067	-0.0178972	0.222695	-0.0233826	-0.208306	0.960251	0.039834	0.946762	0.2539	1	1	1	1	k__Bacteria;	p__Firmicutes;	c__Clostridia;	o__Clostridiales;	f__Lachnospiraceae;	g__g
	2642	0.0192401	0.21181	0.0675787	-0.250001	0.981033	0.0402791	0.704546	0.117127	1	1	1	1	k__Bacteria;	p__Bacteroidetes;	c__Bacteroidia;	o__Bacteroidales;	f__Bacteroidaceae;	g__Bacteroides
	2292	0.00700355	0.165686	0.0214018	-0.13226	0.983449	0.0438667	0.924015	0.356887	1	1	1	1	k__Bacteria;	p__Bacteroidetes;	c__Bacteroidia;	o__Bacteroidales;	f__Bacteroidaceae;	g__Bacteroides
Significantly higher abundance on media with the SDD cocktail of antibiotics	687	-0.0134062	0.0996524	0.291116	-0.102339	0.981033	0.438838	0.0100191	0.632253	1	1	1	1	k__Bacteria;	p__Firmicutes;	c__Bacilli;	o__Lactobacillales;	f__Enterococcaceae;	g__Enterococcus
	748	0.0555851	0.0861426	0.316631	-0.141546	0.875603	0.585974	0.0107232	0.516384	1	1	1	1	k__Bacteria;	p__Firmicutes;	c__Bacilli;	o__Lactobacillales;	f__Enterococcaceae;	g__Enterococcus
	729	0.0741581	0.0303178	0.365931	-0.167328	0.795814	0.918253	0.0038248	0.435123	1	1	0.321283	1	k__Bacteria;	p__Firmicutes;	c__Bacilli;	o__Lactobacillales;	f__Enterococcaceae;	g__Enterococcus
Significantly higher abundance on media without antibiotics	322	1.71454	-1.60179	-1.50448	1.34179	3.30669e-12	0	3.30669e-12	3.24335e-06	2.12443e-11	0	2.31468e-11	5.83804e-05	k__Bacteria;	p__Firmicutes;	c__Clostridia;	o__Clostridiales;	f__Ruminococcaceae;	g__g
	56	1.20504	-0.636233	-1.13914	0.53499	0.000714245	0.00910105	1.01896e-05	0.204633	0.0392835	0.973812	0.000203793	1	k__Bacteria;	p__Proteobacteria;	c__Gammaproteobacteria;	o__Enterobacteriales;	f__Enterobacteriaceae;	g__Escherichia-Shigella
	3635	0.840453	-0.832641	-0.80942	0.804093	2.75574e-08	2.32672e-07	1.86865e-05	0.00139297	2.75574e-07	3.25741e-06	0.000411103	0.0914115	k__Bacteria;	p__Firmicutes;	c__Clostridia;	o__Clostridiales;	f__Lachnospiraceae;	g__Incertae_Sedis
	3628	0.816761	-0.808883	-0.782607	0.778353	6.36843e-08	4.14713e-07	3.12946e-05	0.00179749	7.00527e-07	6.2207e-06	0.00075107	0.131217	k__Bacteria;	p__Firmicutes;	c__Clostridia;	o__Clostridiales;	f__Lachnospiraceae;	g__Incertae_Sedis
	3631	0.880634	-0.872435	-0.819891	0.814956	2.75574e-08	2.05409e-07	3.32452e-05	0.00188399	2.50241e-07	2.67032e-06	0.00083113	0.141299	k__Bacteria;	p__Firmicutes;	c__Clostridia;	o__Clostridiales;	f__Lachnospiraceae;	g__Incertae_Sedis
	71	0.942509	-0.563633	-1.01011	0.574701	0.00147617	0.0151971	3.40998e-05	0.12205	0.0989035	1	0.000915176	1	k__Bacteria;	p__Proteobacteria;	c__Gammaproteobacteria;	o__Enterobacteriales;	f__Enterobacteriaceae;	g__Escherichia-Shigella
	44	0.770491	-0.557379	-0.793072	0.534854	0.000323241	0.00172276	5.28833e-05	0.0634425	0.0138993	0.11887	0.00153362	1	k__Bacteria;	p__Proteobacteria;	c__Gammaproteobacteria;	o__Enterobacteriales;	f__Enterobacteriaceae;	g__Escherichia-Shigella
	83	0.976264	-0.511938	-0.869693	0.336275	0.00470482	0.0135413	7.4511e-05	0.372071	0.40932	1	0.00225538	1	k__Bacteria;	p__Proteobacteria;	c__Gammaproteobacteria;	o__Enterobacteriales;	f__Enterobacteriaceae;	g__Escherichia-Shigella
	3573	0.820334	-0.812641	-0.756533	0.75045	6.41144e-08	7.07355e-07	8.52756e-05	0.0038248	7.69373e-07	1.13177e-05	0.00289937	0.320612	k__Bacteria;	p__Firmicutes;	c__Clostridia;	o__Clostridiales;	f__Lachnospiraceae;	g__Incertae_Sedis
	58	0.325311	-0.224002	-0.322847	0.215903	0.0128266	0.00950254	0.000601403	0.122672	1	1	0.0294688	1	k__Bacteria;	p__Proteobacteria;	c__Gammaproteobacteria;	o__Enterobacteriales;	f__Enterobacteriaceae;	g__Escherichia-Shigella
	86	0.474491	-0.296341	-0.54939	0.308574	0.0143729	0.063275	0.000703889	0.236032	1	1	0.03801	1	k__Bacteria;	p__Proteobacteria;	c__Gammaproteobacteria;	o__Enterobacteriales;	f__Enterobacteriaceae;	g__Escherichia-Shigella
	2108	0.377465	-0.371368	-0.352587	0.346376	0.000207036	9.02584e-05	0.0015098	0.0225562	0.00828144	0.00315904	0.102667	1	k__Bacteria;	p__Bacteroidetes;	c__Bacteroidia;	o__Bacteroidales;	f__Porphyromonadaceae;	g__Parabacteroides
	2111	0.272535	-0.272018	-0.28545	0.270594	0.00033961	0.000675702	0.00189439	0.0339584	0.0149428	0.0351365	0.143974	1	k__Bacteria;	p__Bacteroidetes;	c__Bacteroidia;	o__Bacteroidales;	f__Porphyromonadaceae;	g__Parabacteroides
	72	0.240351	-0.156174	-0.257061	0.152963	0.00577019	0.0629712	0.00313823	0.269898	0.542398	1	0.254197	1	k__Bacteria;	p__Proteobacteria;	c__Gammaproteobacteria;	o__Enterobacteriales;	f__Enterobacteriaceae;	g__Escherichia-Shigella
	3569	0.257829	-0.261214	-0.248929	0.253271	7.4511e-05	0.000319554	0.00351486	0.0293717	0.00230984	0.0132729	0.288219	1	k__Bacteria;	p__Firmicutes;	c__Clostridia;	o__Clostridiales;	f__Lachnospiraceae;	g__Incertae_Sedis
	3625	0.310858	-0.311345	-0.295266	0.299002	0.000151797	0.000405597	0.00450736	0.0339584	0.00567818	0.0182519	0.383126	1	k__Bacteria;	p__Firmicutes;	c__Clostridia;	o__Clostridiales;	f__Lachnospiraceae;	g__Incertae_Sedis
	1567	0.128687	-0.0226032	-0.174442	0.110375	0.310017	0.841959	0.00526329	0.257155	1	1	0.468433	1	k__Bacteria;	p__Firmicutes;	c__Bacilli;	o__Lactobacillales;	f__Enterococcaceae;	g__Enterococcus
	47	0.415679	-0.179499	-0.501436	0.197152	0.066827	0.390735	0.00716939	0.566709	1	1	0.70389	1	k__Bacteria;	p__Proteobacteria;	c__Gammaproteobacteria;	o__Enterobacteriales;	f__Enterobacteriaceae;	g__Escherichia-Shigella
	1393	0.575283	-0.218419	-0.450655	0.204194	0.12502	0.218923	0.00755923	0.481629	1	1	0.755923	1	k__Bacteria;	p__Firmicutes;	c__Bacilli;	o__Lactobacillales;	f__Enterococcaceae;	g__Enterococcus
	204	0.327622	-0.200131	-0.332028	0.191134	0.0211954	0.120444	0.0128266	0.372071	1	1	1	1	k__Bacteria;	p__Proteobacteria;	c__Deltaproteobacteria;	o__Desulfovibrionales;	f__Desulfovibrionaceae;	g__Desulfovibrio
	572	0.076063	-0.0723106	0.242356	-0.242637	0.426929	0.54274	0.0135413	0.0701127	1	1	1	1	k__Bacteria;	p__Firmicutes;	c__Bacilli;	o__Lactobacillales;	f__Lactobacillaceae;	g__Lactobacillus
	113	1.57346	-1.57452	0.454529	-0.4144	0	0	0.0136766	0.110607	0	0	1	1	k__Bacteria;	p__Proteobacteria;	c__Gammaproteobacteria;	o__Oceanospirillales;	f__Halomonadaceae;	g__Halomonas
	2198	0.267583	-0.242053	-0.261659	0.279555	0.00177499	0.0114183	0.0184144	0.0629712	0.126024	1	1	1	k__Bacteria;	p__Bacteroidetes;	c__Bacteroidia;	o__Bacteroidales;	f__Rikenellaceae;	g__Alistipes
	230	0.303579	-0.0119618	-0.071791	0.055601	0.571328	0.814788	0.0220756	0.236032	1	1	1	1	k__Bacteria;	p__Firmicutes;	c__Bacilli;	o__Lactobacillales;	f__Enterococcaceae;	g__Enterococcus
	2951	0.0710774	-0.0688087	0.193929	-0.195371	0.371913	0.48571	0.0262964	0.102872	1	1	1	1	k__Bacteria;	p__Firmicutes;	c__Clostridia;	o__Clostridiales;	f__Lachnospiraceae;	g__Incertae_Sedis
	3580	0.206934	-0.165051	-0.180132	0.144964	0.00526329	0.0225562	0.0314508	0.243832	0.467164	1	1	1	k__Bacteria;	p__Firmicutes;	c__Clostridia;	o__Clostridiales;	f__Lachnospiraceae;	g__Incertae_Sedis
	1420	0.187247	-0.135309	-0.193353	0.110265	0.0370933	0.109073	0.0330011	0.45227	1	1	1	1	k__Bacteria;	p__Firmicutes;	c__Bacilli;	o__Lactobacillales;	f__Enterococcaceae;	g__Enterococcus
	3156	0.206751	-0.214205	0.302793	-0.258826	0.0751336	0.104177	0.0336616	0.21851	1	1	1	1	k__Bacteria;	p__Firmicutes;	c__Clostridia;	o__Clostridiales;	f__Peptostreptococcaceae;	g__Incertae_Sedis
	173	0.492144	-0.490848	0.394403	-0.408013	0.000166073	0.0011697	0.0339584	0.109073	0.00647684	0.0690124	1	1	k__Bacteria;	p__Proteobacteria;	c__Gammaproteobacteria;	o__Alteromonadales;	f__Idiomarinaceae;	g__g
	17	0.128911	-0.128911	0.22411	-0.22411	0.0932579	0.227338	0.037049	0.132114	1	1	1	1	k__Bacteria;	p__Proteobacteria;	c__Alphaproteobacteria;	o__Sphingomonadales;	f__Sphingomonadaceae;	g__Sphingomonas
	2985	0.259196	-0.198315	-0.247294	0.186046	0.00607701	0.068021	0.04231	0.309246	0.58947	1	1	1	k__Bacteria;	p__Firmicutes;	c__Clostridia;	o__Clostridiales;	f__Lachnospiraceae;	g__Incertae_Sedis
	718	0.297882	-0.04221	0.30017	0.0129686	0.314596	0.881787	0.0444732	0.984208	1	1	1	1	k__Bacteria;	p__Firmicutes;	c__Bacilli;	o__Lactobacillales;	f__Enterococcaceae;	g__Enterococcus
Significant interaction between media and antibiotics (postive slope)	322	1.71454	-1.60179	-1.50448	1.34179	3.30669e-12	0	3.30669e-12	3.24335e-06	2.12443e-11	0	2.31468e-11	5.83804e-05	k__Bacteria;	p__Firmicutes;	c__Clostridia;	o__Clostridiales;	f__Ruminococcaceae;	g__g
	3635	0.840453	-0.832641	-0.80942	0.804093	2.75574e-08	2.32672e-07	1.86865e-05	0.00139297	2.75574e-07	3.25741e-06	0.000411103	0.0914115	k__Bacteria;	p__Firmicutes;	c__Clostridia;	o__Clostridiales;	f__Lachnospiraceae;	g__Incertae_Sedis
	3628	0.816761	-0.808883	-0.782607	0.778353	6.36843e-08	4.14713e-07	3.12946e-05	0.00179749	7.00527e-07	6.2207e-06	0.00075107	0.131217	k__Bacteria;	p__Firmicutes;	c__Clostridia;	o__Clostridiales;	f__Lachnospiraceae;	g__Incertae_Sedis
	3631	0.880634	-0.872435	-0.819891	0.814956	2.75574e-08	2.05409e-07	3.32452e-05	0.00188399	2.50241e-07	2.67032e-06	0.00083113	0.141299	k__Bacteria;	p__Firmicutes;	c__Clostridia;	o__Clostridiales;	f__Lachnospiraceae;	g__Incertae_Sedis
	3573	0.820334	-0.812641	-0.756533	0.75045	6.41144e-08	7.07355e-07	8.52756e-05	0.0038248	7.69373e-07	1.13177e-05	0.00289937	0.320612	k__Bacteria;	p__Firmicutes;	c__Clostridia;	o__Clostridiales;	f__Lachnospiraceae;	g__Incertae_Sedis
	2108	0.377465	-0.371368	-0.352587	0.346376	0.000207036	9.02584e-05	0.0015098	0.0225562	0.00828144	0.00315904	0.102667	1	k__Bacteria;	p__Bacteroidetes;	c__Bacteroidia;	o__Bacteroidales;	f__Porphyromonadaceae;	g__Parabacteroides
	3569	0.257829	-0.261214	-0.248929	0.253271	7.4511e-05	0.000319554	0.00351486	0.0293717	0.00230984	0.0132729	0.288219	1	k__Bacteria;	p__Firmicutes;	c__Clostridia;	o__Clostridiales;	f__Lachnospiraceae;	g__Incertae_Sedis
	725	2.74826	-0.243357	-0.505694	0.829338	0.0029834	0.478753	0.118224	0.0337583	0.235688	1	1	1	k__Bacteria;	p__Firmicutes;	c__Bacilli;	o__Lactobacillales;	f__Enterococcaceae;	g__Enterococcus
	3625	0.310858	-0.311345	-0.295266	0.299002	0.000151797	0.000405597	0.00450736	0.0339584	0.00567818	0.0182519	0.383126	1	k__Bacteria;	p__Firmicutes;	c__Clostridia;	o__Clostridiales;	f__Lachnospiraceae;	g__Incertae_Sedis
	2111	0.272535	-0.272018	-0.28545	0.270594	0.00033961	0.000675702	0.00189439	0.0339584	0.0149428	0.0351365	0.143974	1	k__Bacteria;	p__Bacteroidetes;	c__Bacteroidia;	o__Bacteroidales;	f__Porphyromonadaceae;	g__Parabacteroides
Significant interaction between media and antibiotics (negative slope)	3088	0.641035	0.703508	-0.0534026	-0.991587	0.224188	0.00175599	0.94396	0.00266529	1	0.12292	1	0.207893	k__Bacteria;	p__Bacteroidetes;	c__Bacteroidia;	o__Bacteroidales;	f__Bacteroidaceae;	g__Bacteroides
	2287	1.02688	1.60242	-0.0712579	-1.49273	0.0733806	8.21275e-06	0.960731	0.00785637	1	0.000156042	1	0.815946	k__Bacteria;	p__Firmicutes;	c__Clostridia;	o__Clostridiales;	f__Lachnospiraceae;	g__g
	2142	0.32962	0.179367	0.189586	-0.701584	0.281658	0.500202	0.547686	0.0164882	1	1	1	1	k__Bacteria;	p__Bacteroidetes;	c__Bacteroidia;	o__Bacteroidales;	f__Bacteroidaceae;	g__Bacteroides
	2089	0.044265	0.439858	0.115254	-0.487475	0.921153	0.00108288	0.621954	0.0193899	1	0.062807	1	1	k__Bacteria;	p__Bacteroidetes;	c__Bacteroidia;	o__Bacteroidales;	f__Porphyromonadaceae;	g__Parabacteroides
	2590	-0.0139605	0.415057	0.0620269	-0.402295	0.983449	0.000151797	0.798734	0.0207499	1	0.00576831	1	1	k__Bacteria;	p__Bacteroidetes;	c__Bacteroidia;	o__Bacteroidales;	f__Porphyromonadaceae;	g__Parabacteroides
	2101	0.311627	0.385053	-0.0382319	-0.535566	0.464755	0.0220756	0.94396	0.0314508	1	1	1	1	k__Bacteria;	p__Bacteroidetes;	c__Bacteroidia;	o__Bacteroidales;	f__Bacteroidaceae;	g__Bacteroides
	2624	0.00910499	0.315777	0.0808587	-0.37258	0.985336	0.00538964	0.690527	0.032791	1	0.490457	1	1	k__Bacteria;	p__Bacteroidetes;	c__Bacteroidia;	o__Bacteroidales;	f__Porphyromonadaceae;	g__Parabacteroides
	3737	0.0981002	0.248729	-0.03403	-0.301313	0.687045	0.00716939	0.891828	0.0328755	1	0.709769	1	1	k__Bacteria;	p__Bacteroidetes;	c__Bacteroidia;	o__Bacteroidales;	f__Bacteroidaceae;	g__Bacteroides
	2545	0.0475172	0.144332	0.0358367	-0.177387	0.789188	0.0135073	0.742175	0.046162	1	1	1	1	k__Bacteria;	p__Firmicutes;	c__Clostridia;	o__Clostridiales;	f__Lachnospiraceae;	g__Incertae_Sedis
