# Supplementary material for: High throughput cultivation-based screening on porous aluminum oxide chips allows targeted isolation of antibiotic resistant human gut bacteria
Source: PLoS One. 2019 Jan 17;14(1):e0210970. doi: 10.1371/journal.pone.0210970 (PMC6336267; doi:10.1371/journal.pone.0210970)
Supplement: S9 Table — Table A shows the results of the ANA EU(08) test, table B shows the result of the microdilution test, and table C shows the breakpoints for resistance that are recommended by CLSI and EUCAST. (XLSX) [file pone.0210970.s011.xlsx]

## Sheet: Sheet1
Supplementary Table S9. S. intestinalis HF3088, the strain that was obtained in pure culture, was tested for antibiotic resistance. Table A shows the results of the ANA EU(08) test, table B shows the result of the microdilution test, and table C shows the breakpoints for resistance that are recommended by CLSI and EUCAST.
(A)
Antibiotic	µg/ml	ANA EU Test result
Penicillin G	0.25-0.5	S
Amoxicillin	4-8	S
Amoxicillin-Ac. Clavulanic	4/2 -8/2	S
Ticarcillin	8-16	S
Ticarcillin -Ac. Clavulanic	8/2-16/2	S
Piperacillin	8-16	S
Piperacillin-Tazobactam	8/4-16/4	S
Imipenem	2-8	R
Cefoxitin (2nd gen)	32	S
Cefotaxime (3rd gen)	10	S
Clindamycin	4	S
Moxifloxacin	1-2	S
Vancomycin	4-8	S
Rifampicin	4-16	S
Chloramphenicol	8	S
Metronidazole	4	R
(B)
Antibiotic	MIC (µg/ml)	Interpretation
Ampicillin	0.5	S
Imipenem	64	R (CLSI cut-off)
Metronidazole	4	R (EUCAST cut-off) S (CLSI cut-off)
Tetracycline	16	I (CLSI)
Ceftriaxone (2nd gen)	16	S
(C)
Antibiotic	EUCAST (*)	CLSI (** and ***)
Imipenem	NA	>16
Clindamycin	NA	>8
Moxifloxacin	>4	>8
Vancomycin	>2	NA
Rifampicin	>0.004	NA
Chloramphenicol	NA	>32
Metronidazole	>2	>32
*	EUCAST. Breakpoint tables for interpretation of MICs and zone diameters, v5.0. European Committee on Antimicrobial Susceptibility Testing. 2015.
**	CLSI. Performance standards for antimicrobial susceptibility testing; 24th informational supplement. CLSI document M100-S24. Clinical and Laboratory Standards Institute, Wayne, PA. 2014.
***	CLSI. Methods for antimicrobial susceptibility testing of anaerobic bacteria; approved standard 8th ed. CLSI document M11-A8. Clinical and Laboratory Standards Institute, Wayne, PA. 2012.
